# Supplementary material
Source: PubMed Central journal article supplement (PMC3415990)

Figure S1

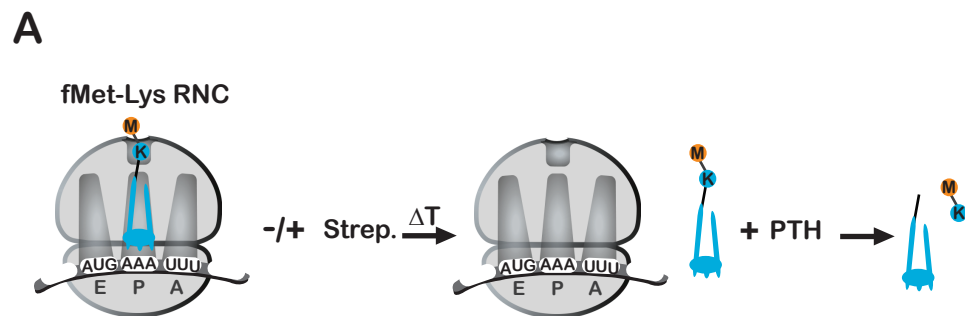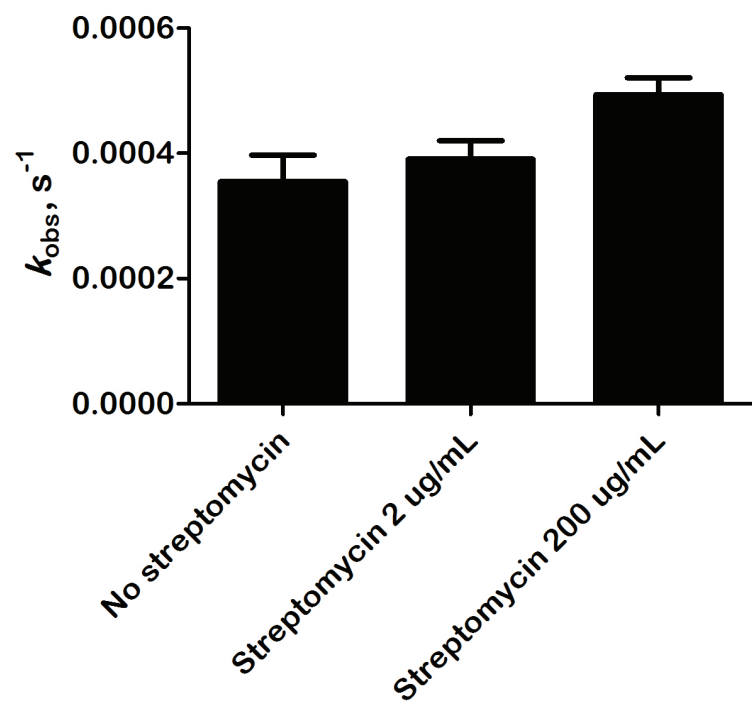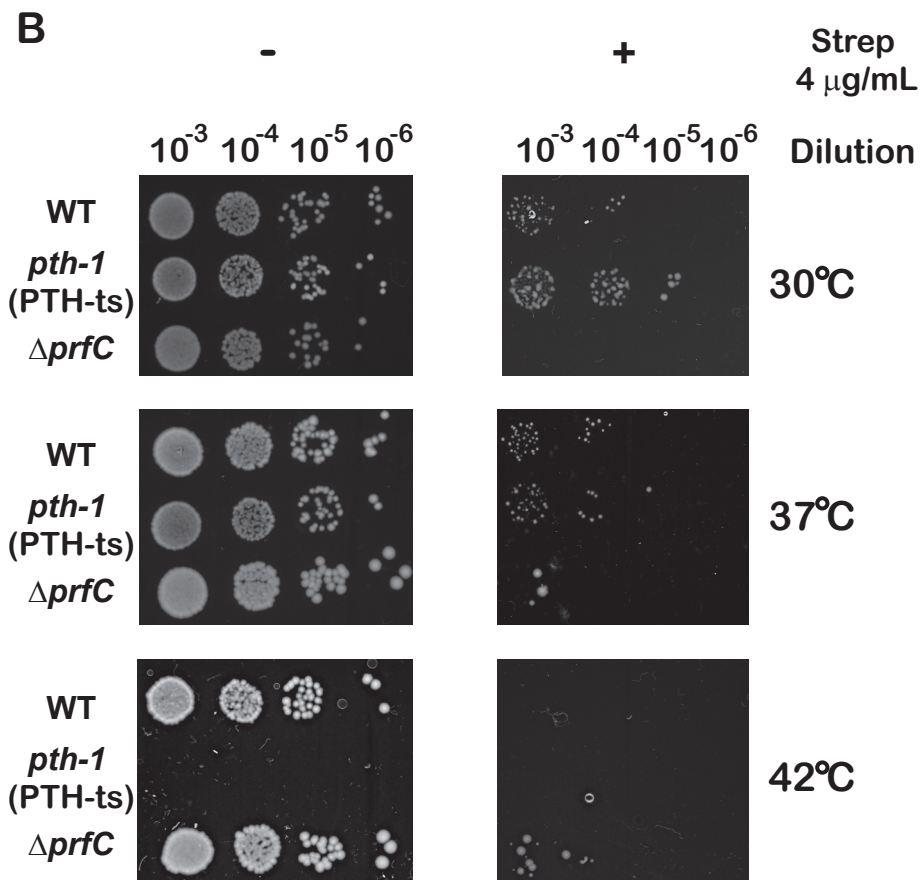

A

| Process                | Compounds                                                                                                                                                          |
|------------------------|--------------------------------------------------------------------------------------------------------------------------------------------------------------------|
| Chelators              | EDTA <sup>*</sup> , 5,7-Dichloro-8-hydroxyquinoline, Fusaric acid, 5-Chloro-7-iodo-8-hydroxyquinoline                                                              |
| Membrane               | Poly-L-Lysine, lauryl sulfobetaine <sup>*</sup> , Chlorohexidine, Protamine sulfate                                                                                |
| Oxidizing agents       | Nitrofurazone <sup>*</sup> , 2-Nitroimidazole, Plumbagin, Lawsone, 1-Chloro-2,4-dinitrobenzene                                                                     |
| Reducing agents        | Thioglycerol                                                                                                                                                       |
| Respiration            | Sorbic acid, Sodium caprylate, Pentachlorophenol, CCCP, Menadione <sup>*</sup> , Tetrazolium violet, Iodonitrotetrazolium violet                                   |
| Toxic ions             | Nitrite, Sodium Cyanate <sup>*</sup> , Ferric Chloride                                                                                                             |
| Cell wall              | Cephalothin, Cefoxitin, Cefuroxime, Cefmetazole, Ceftriaxone, Amoxicillin <sup>*</sup> , Aztreonam, Moxalactam, Azlocillin, Penicillin G, Carbenicillin, Oxacillin |
| Acetylcholine Receptor | Atropine                                                                                                                                                           |
| Anti-tuberculosic      | Ethionamide                                                                                                                                                        |
| Fungicide              | Chloroxylenol, Tolyfluamid, Patulin                                                                                                                                |
| 3PGA dehydrogenase     | D-serine                                                                                                                                                           |
| Ion channel            | Lidocaine                                                                                                                                                          |
| DNA/RNA synthesis      | Myricetin, Trifluorothymidine                                                                                                                                      |
| pH 5                   | Growth at pH 5 <sup>*</sup>                                                                                                                                        |
| Protein Synthesis      | Streptomycin <sup>*</sup> , Spectinomycin                                                                                                                          |

B

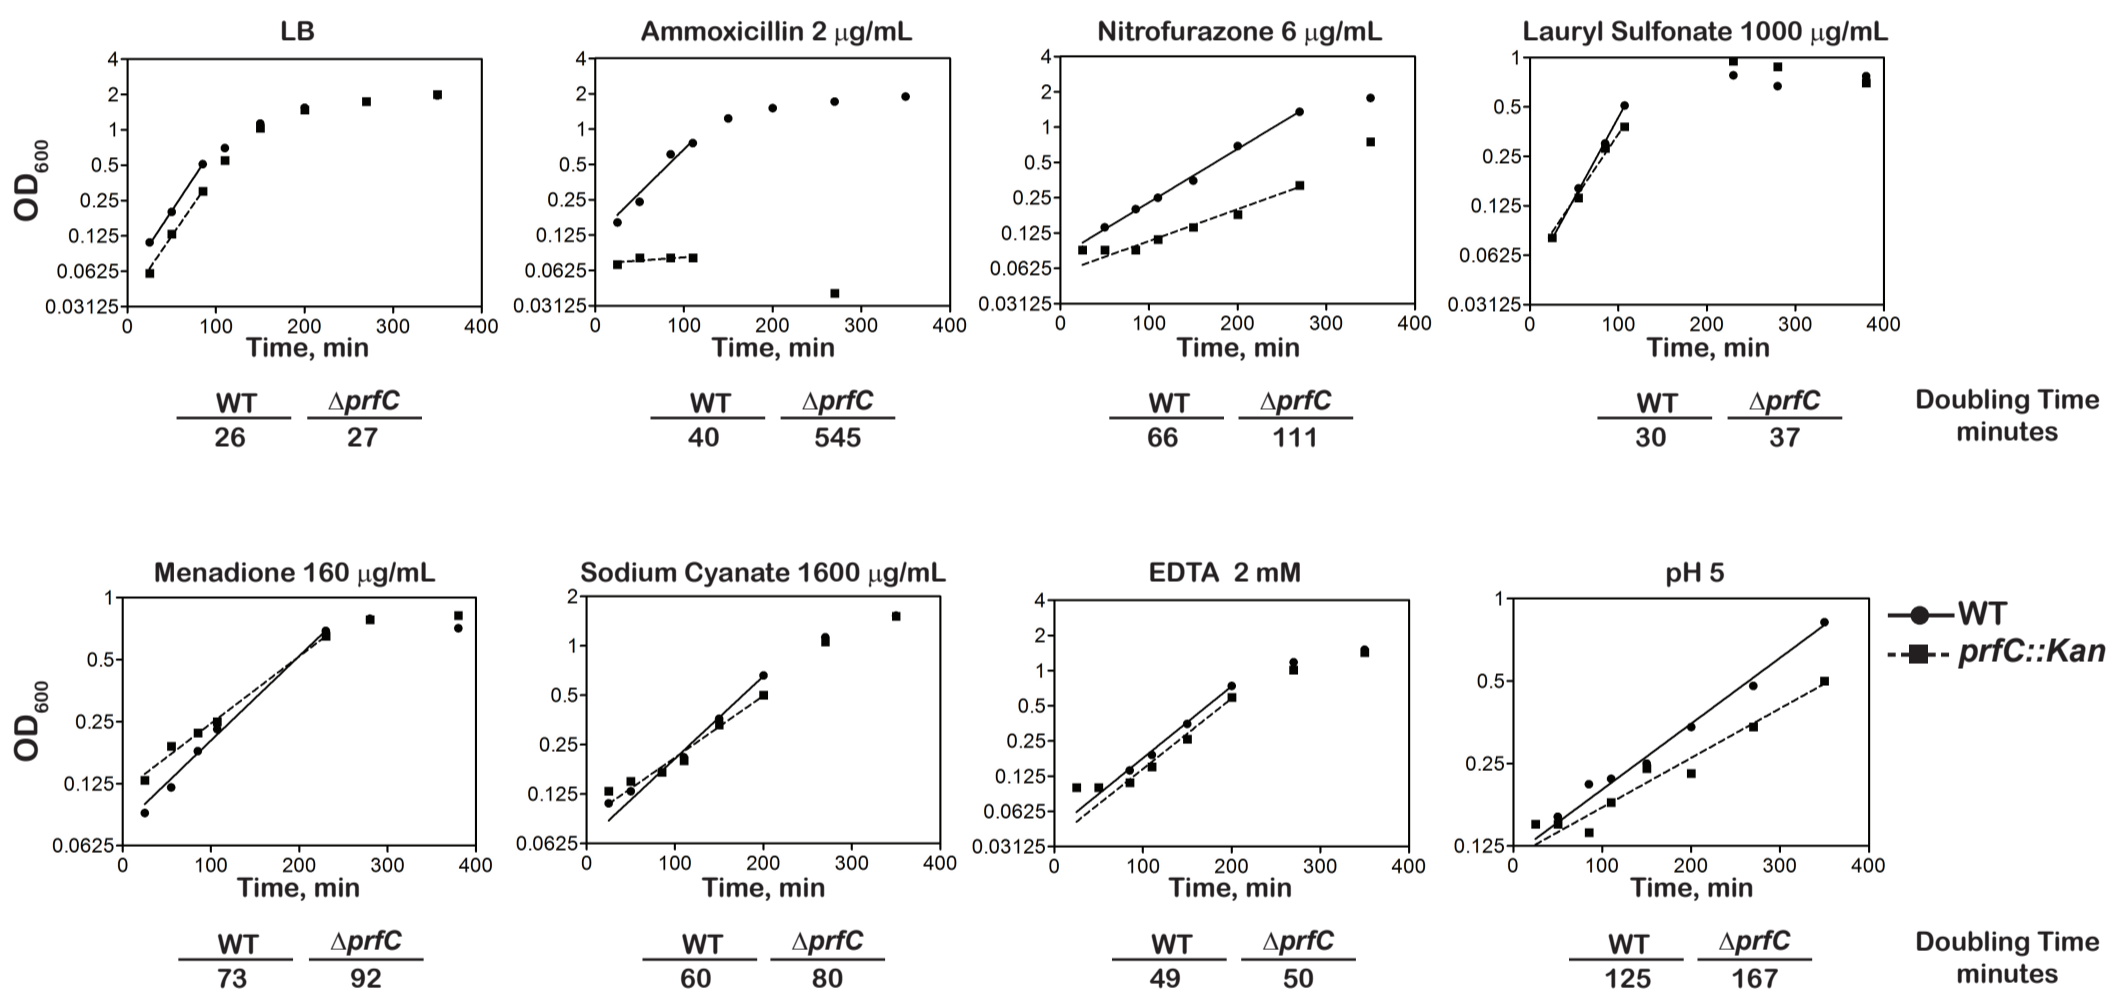

C

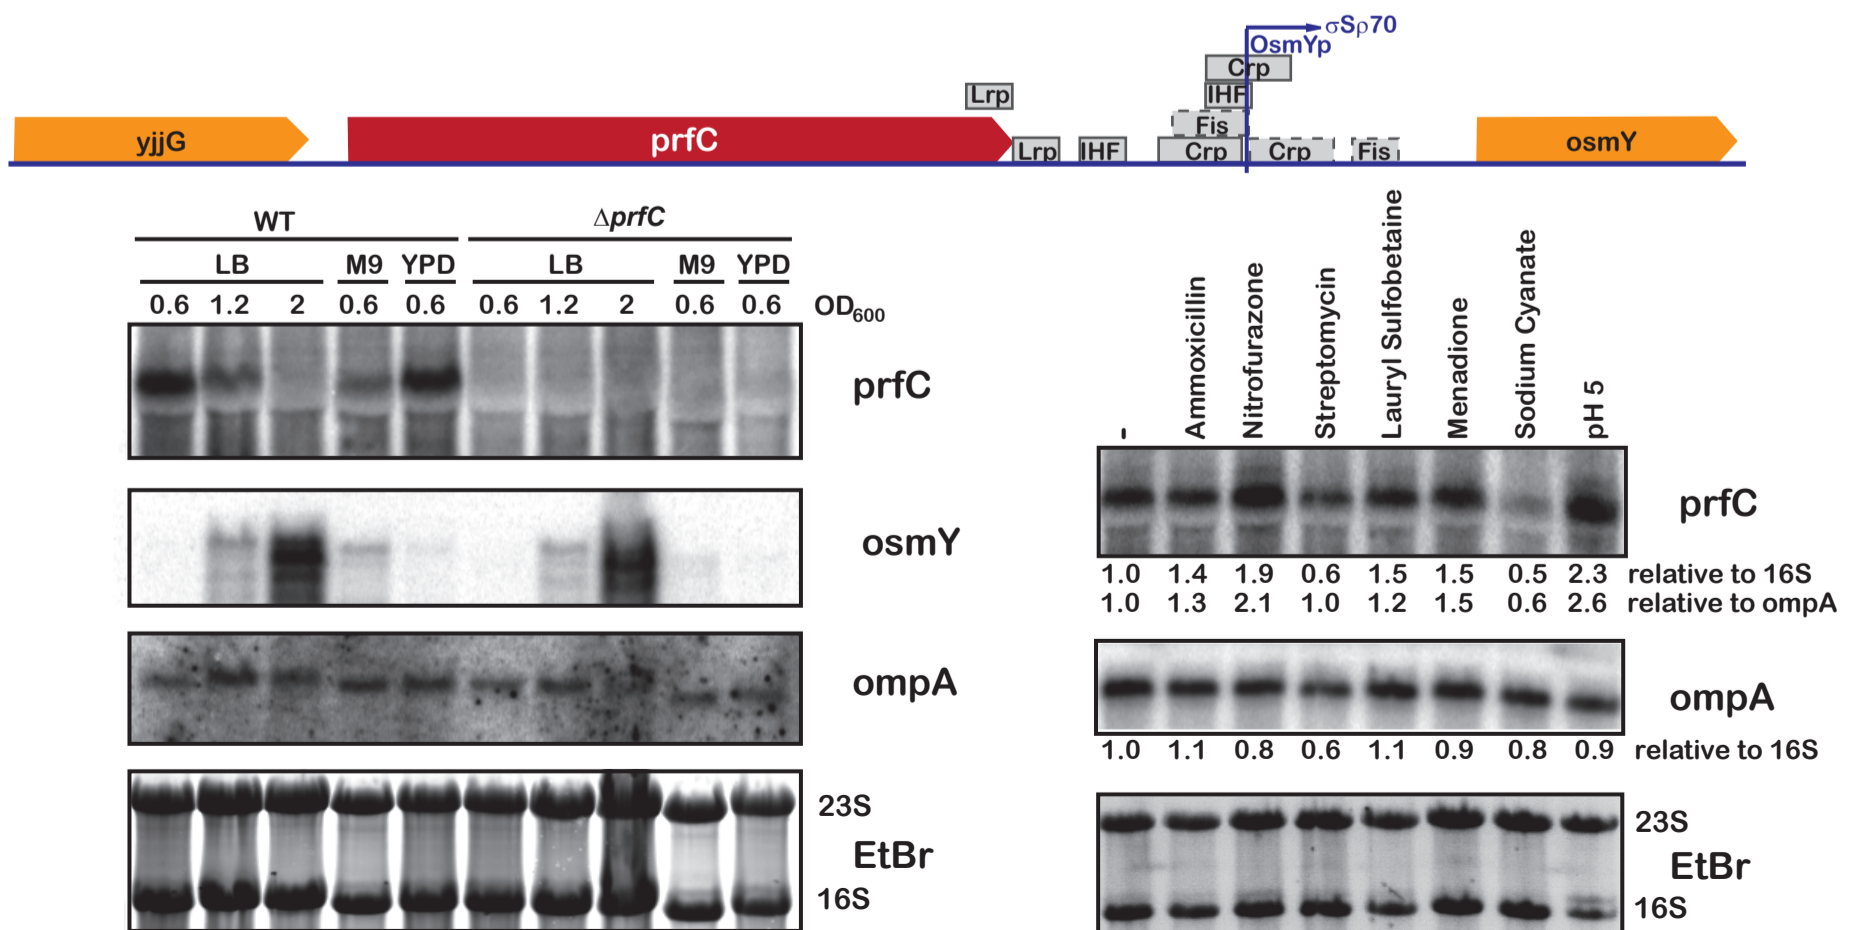

A

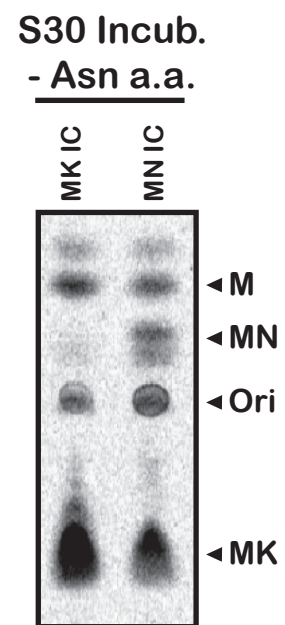

B

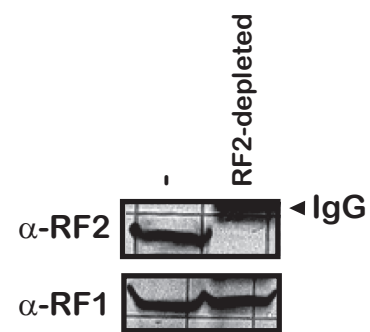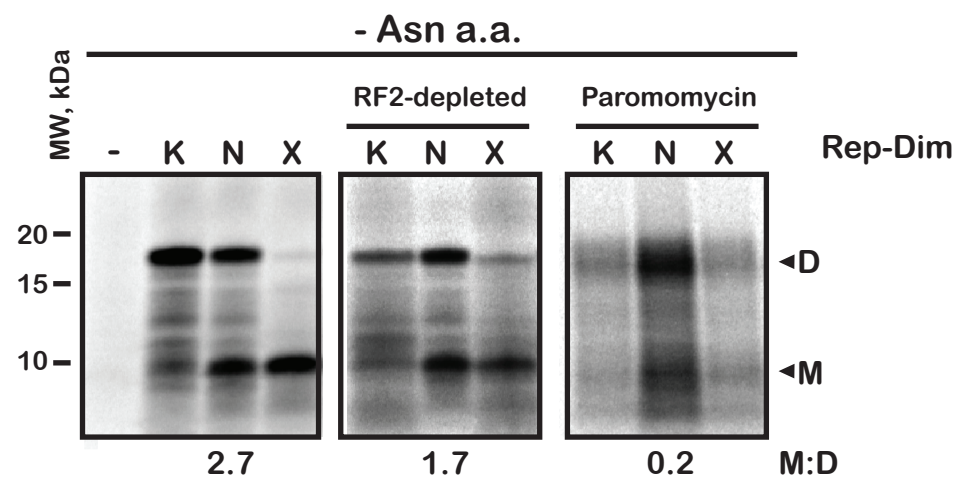

C

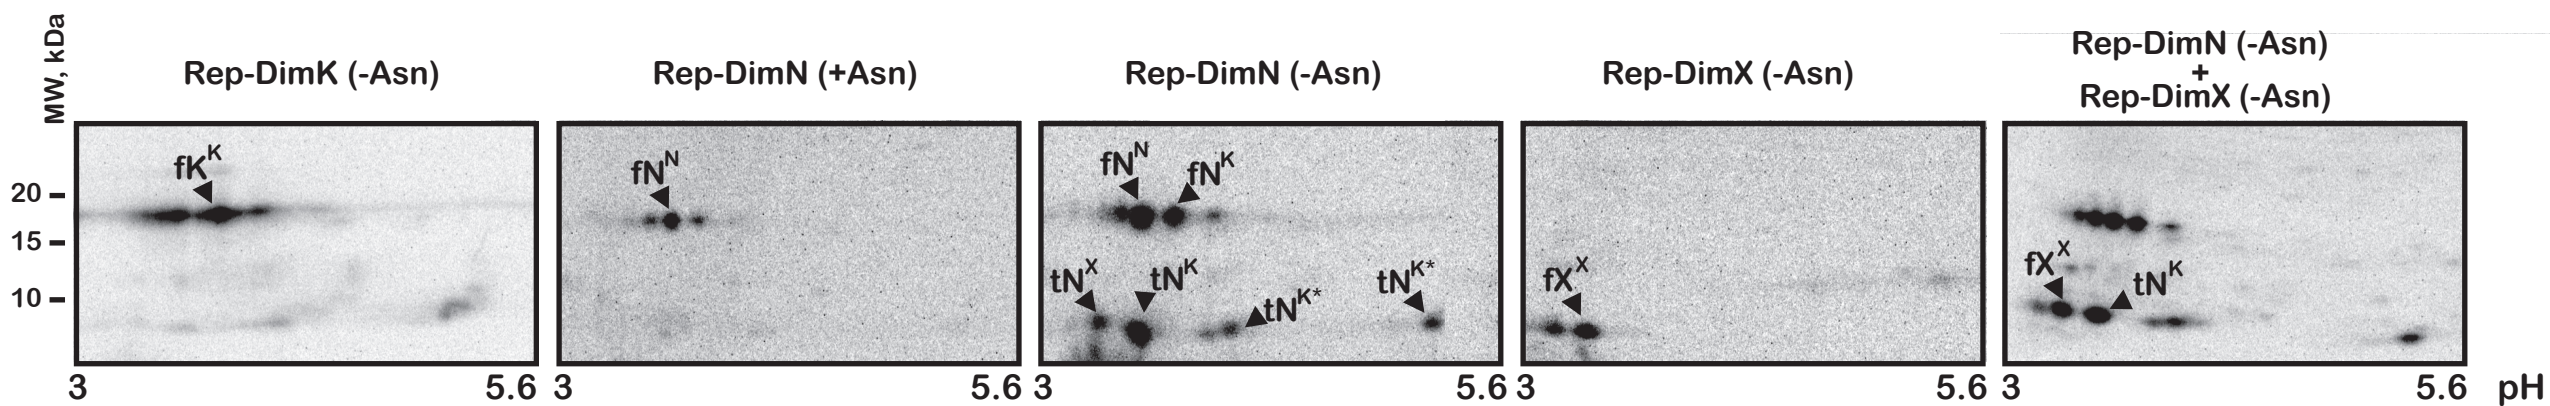

D

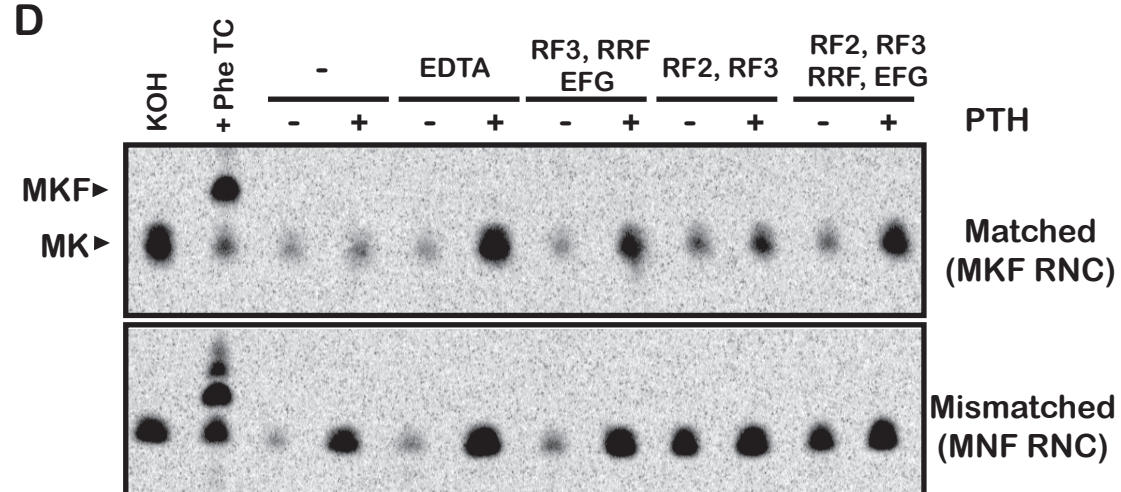

E

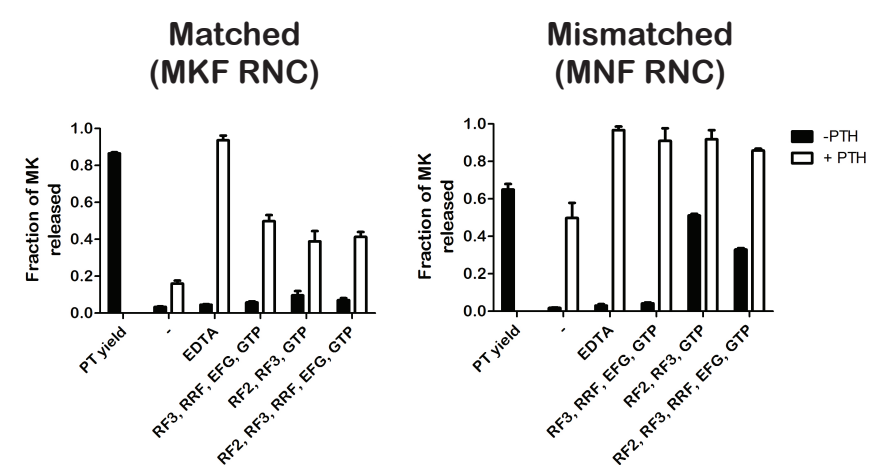

F

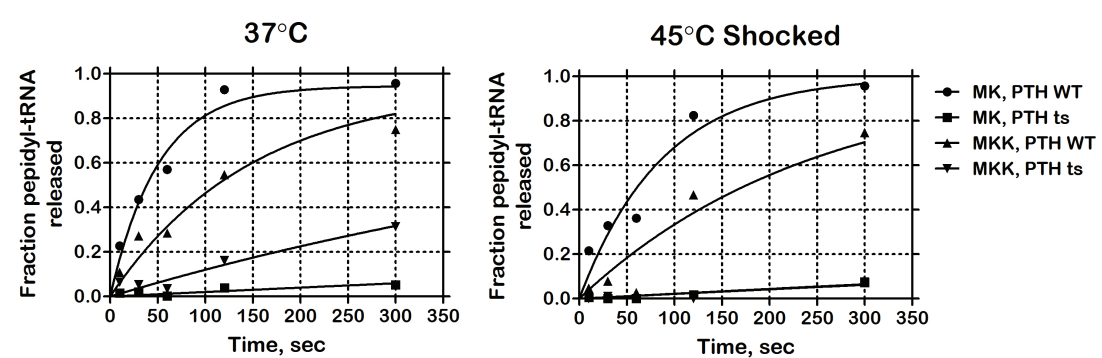

G

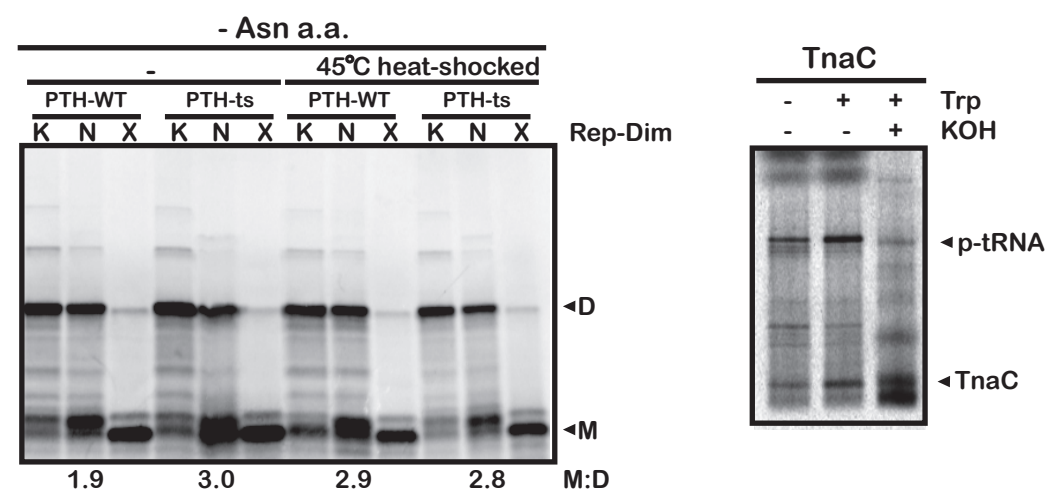

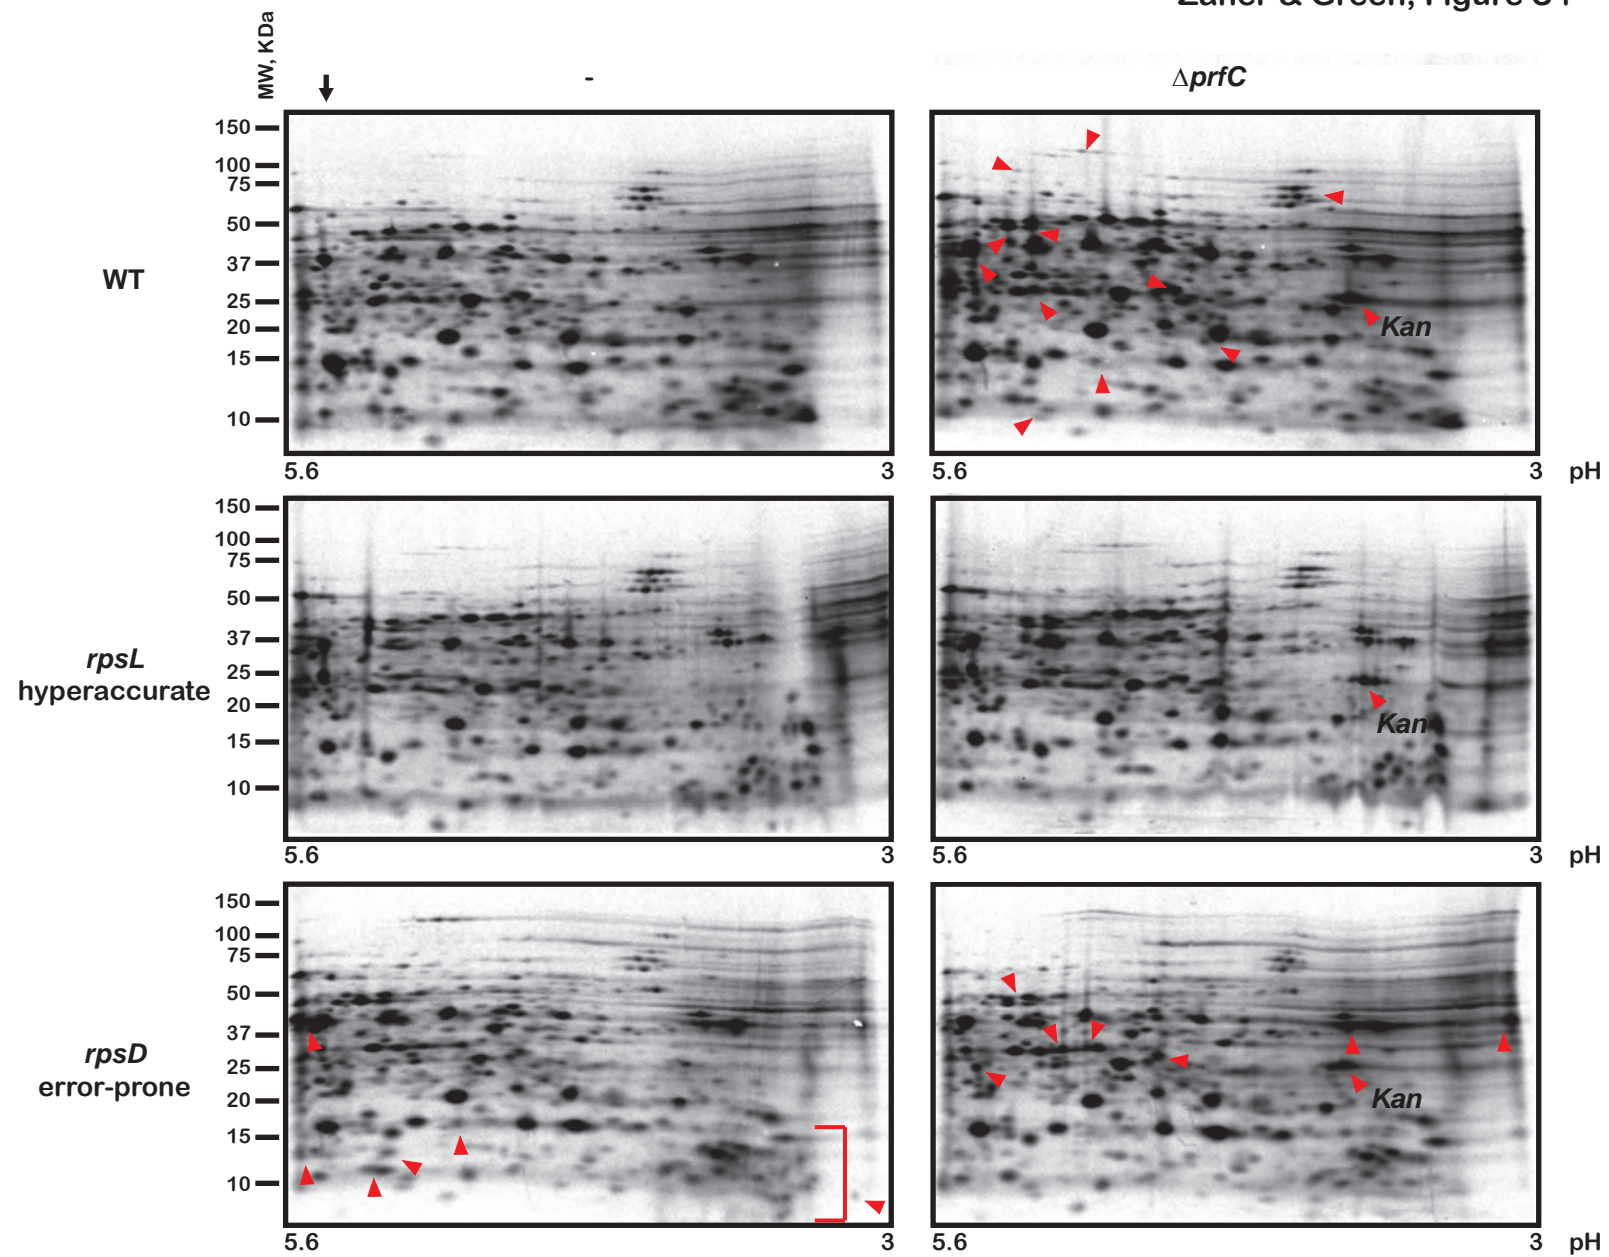**B**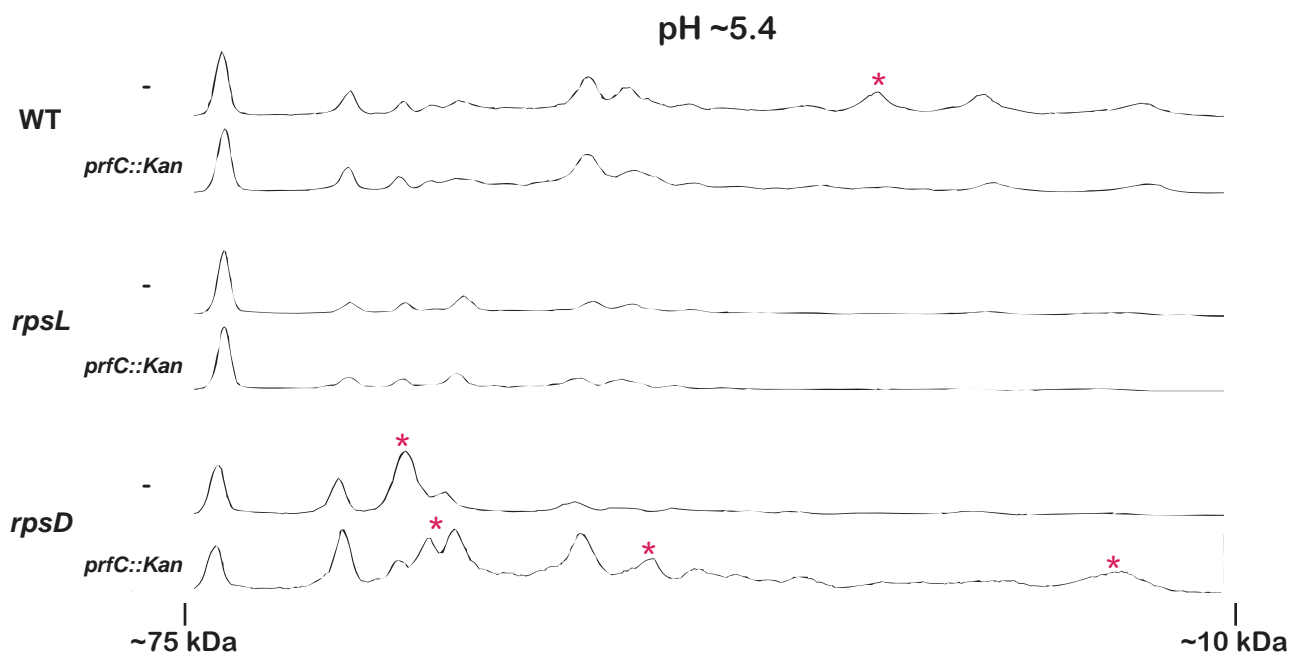

A

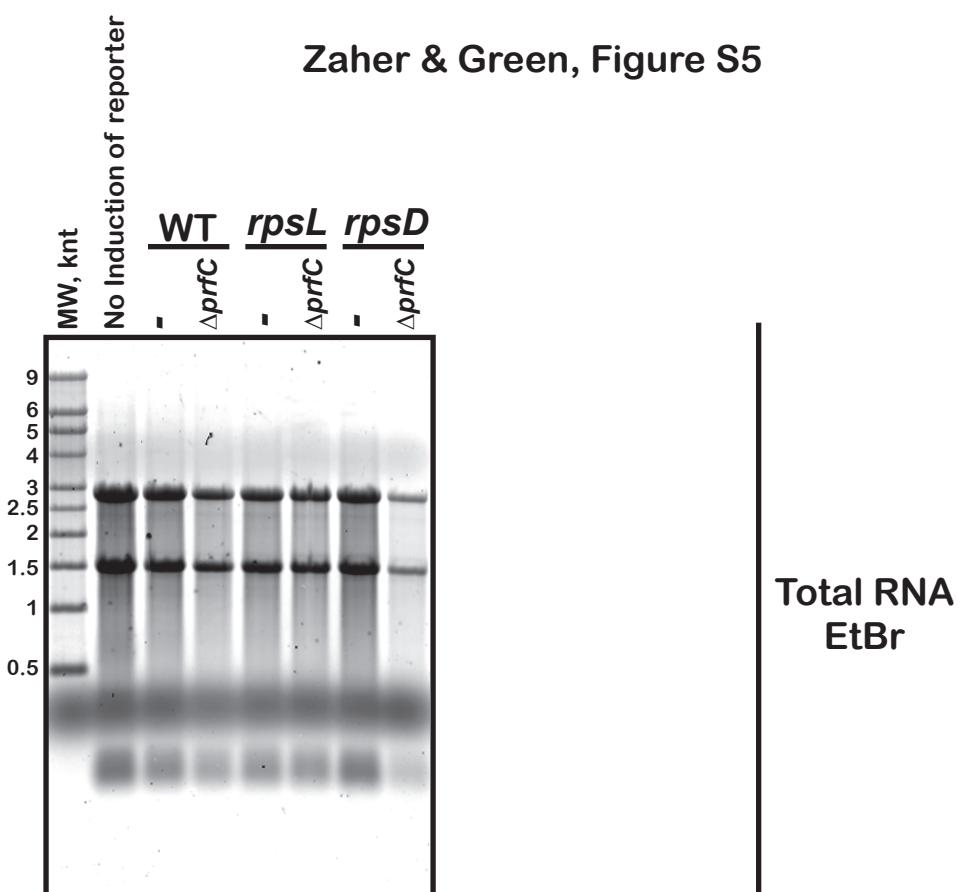

B

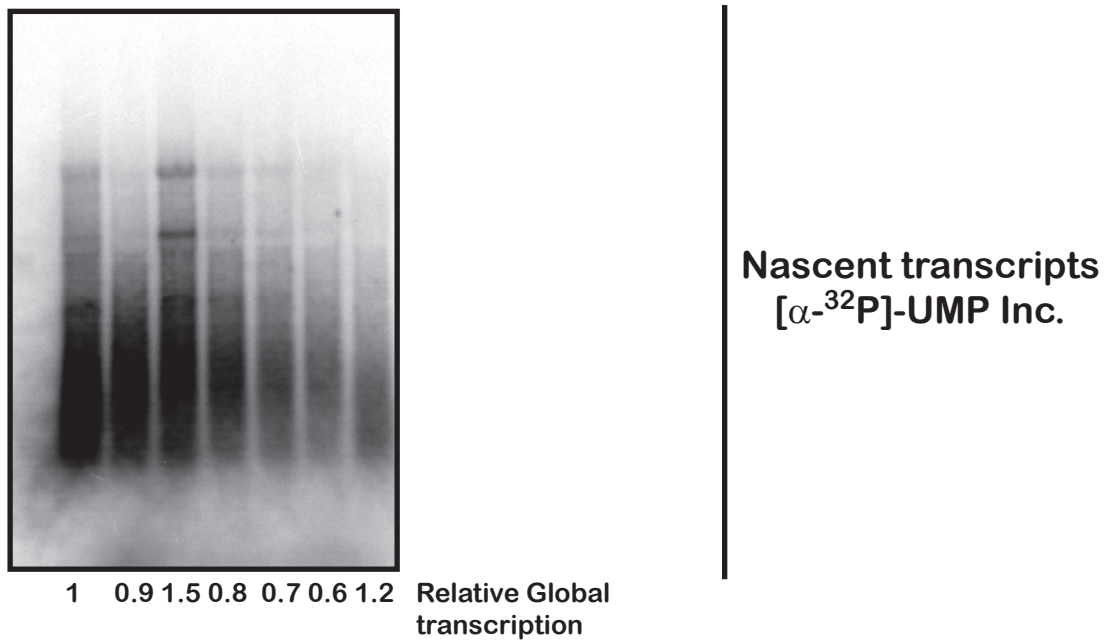

C

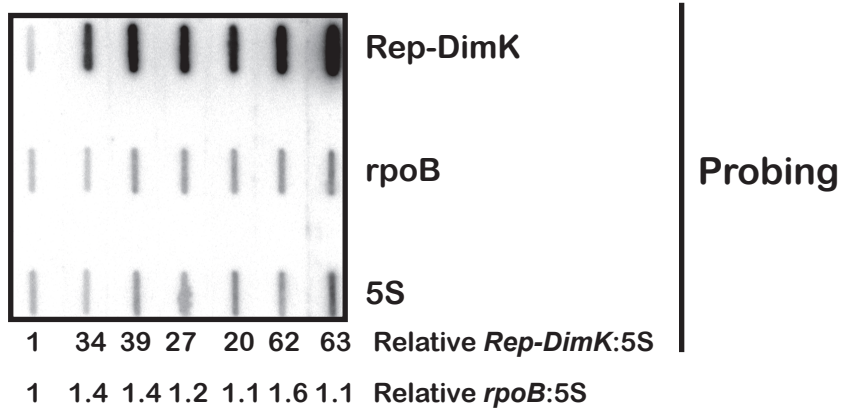

A

Xac strain (WT)

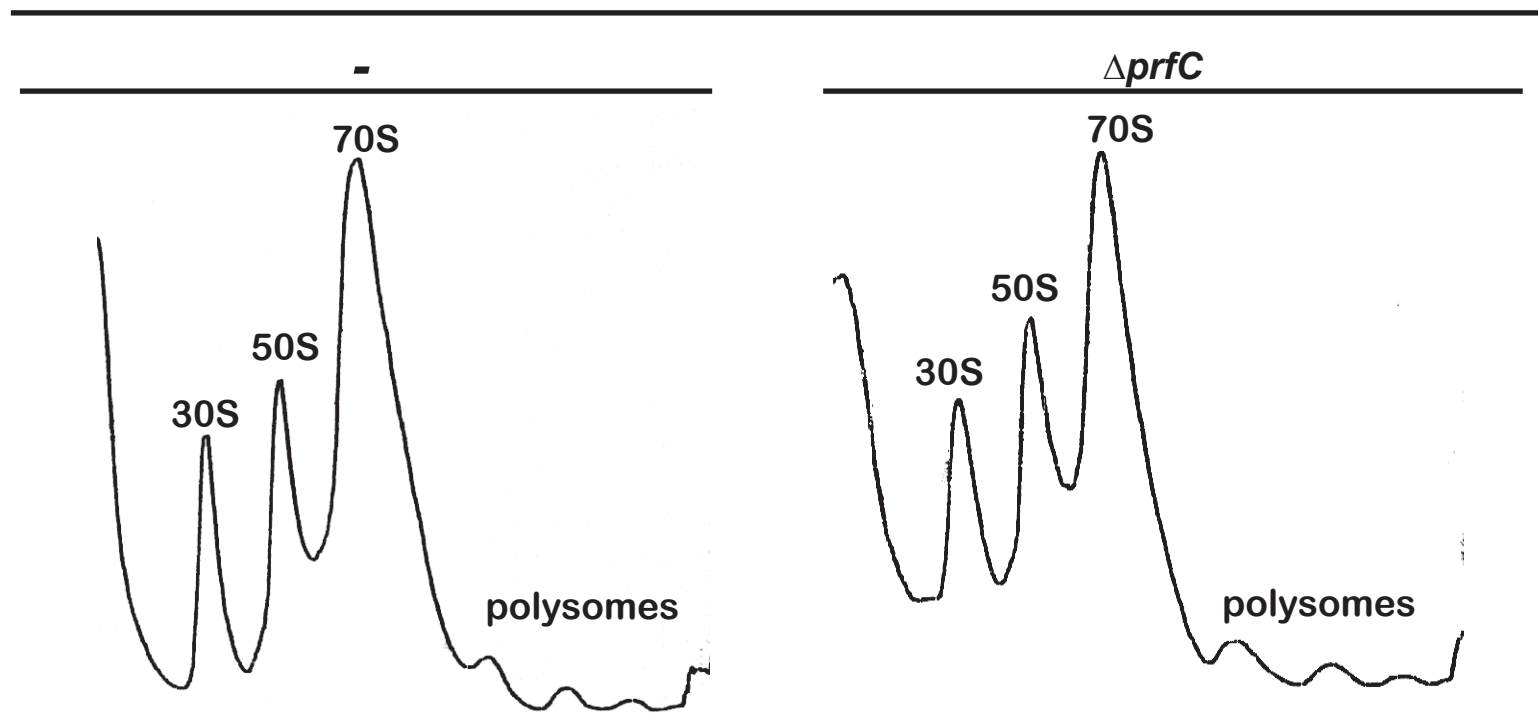

B

US157 strain (*rpsL*, hyperaccurate)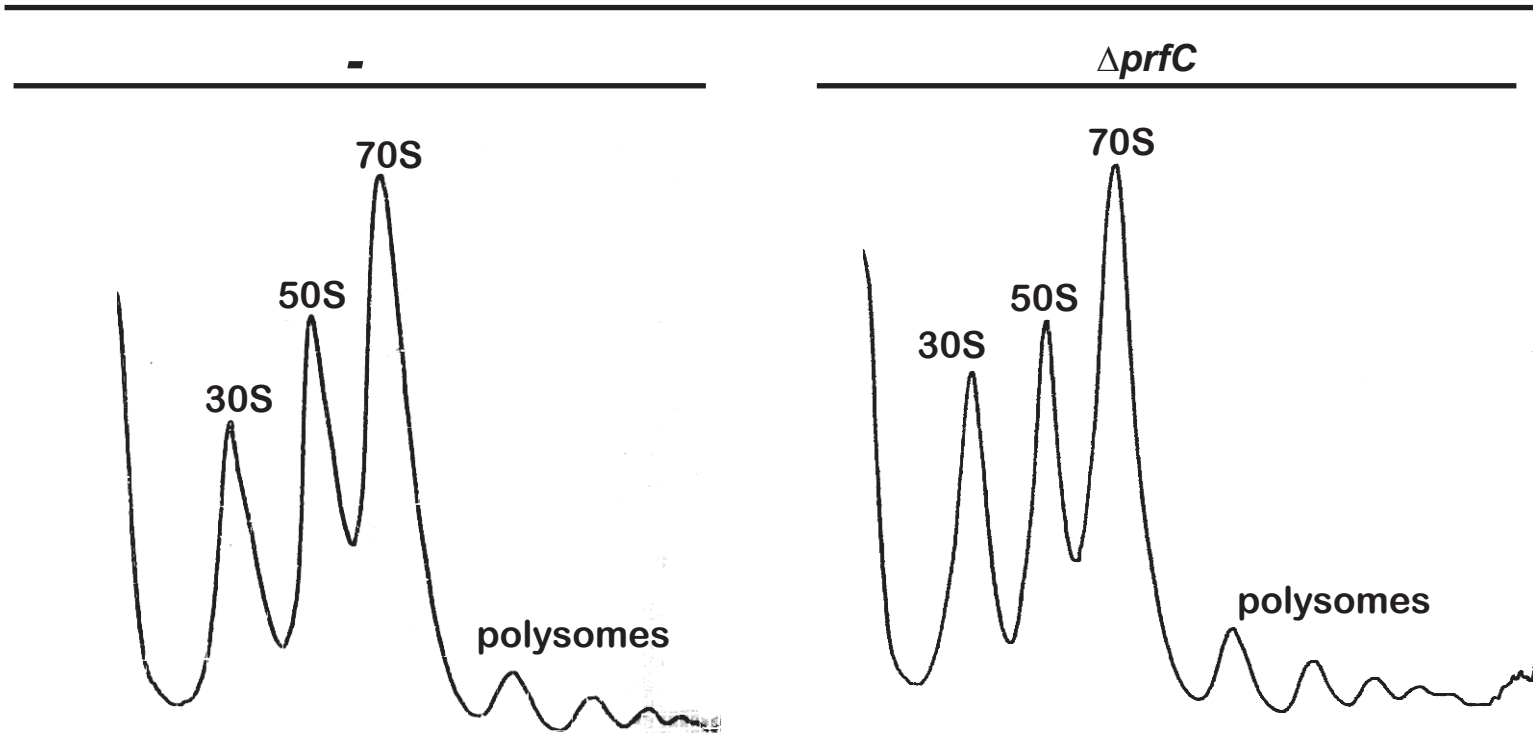

C

JK463 strain (Asn auxotroph)

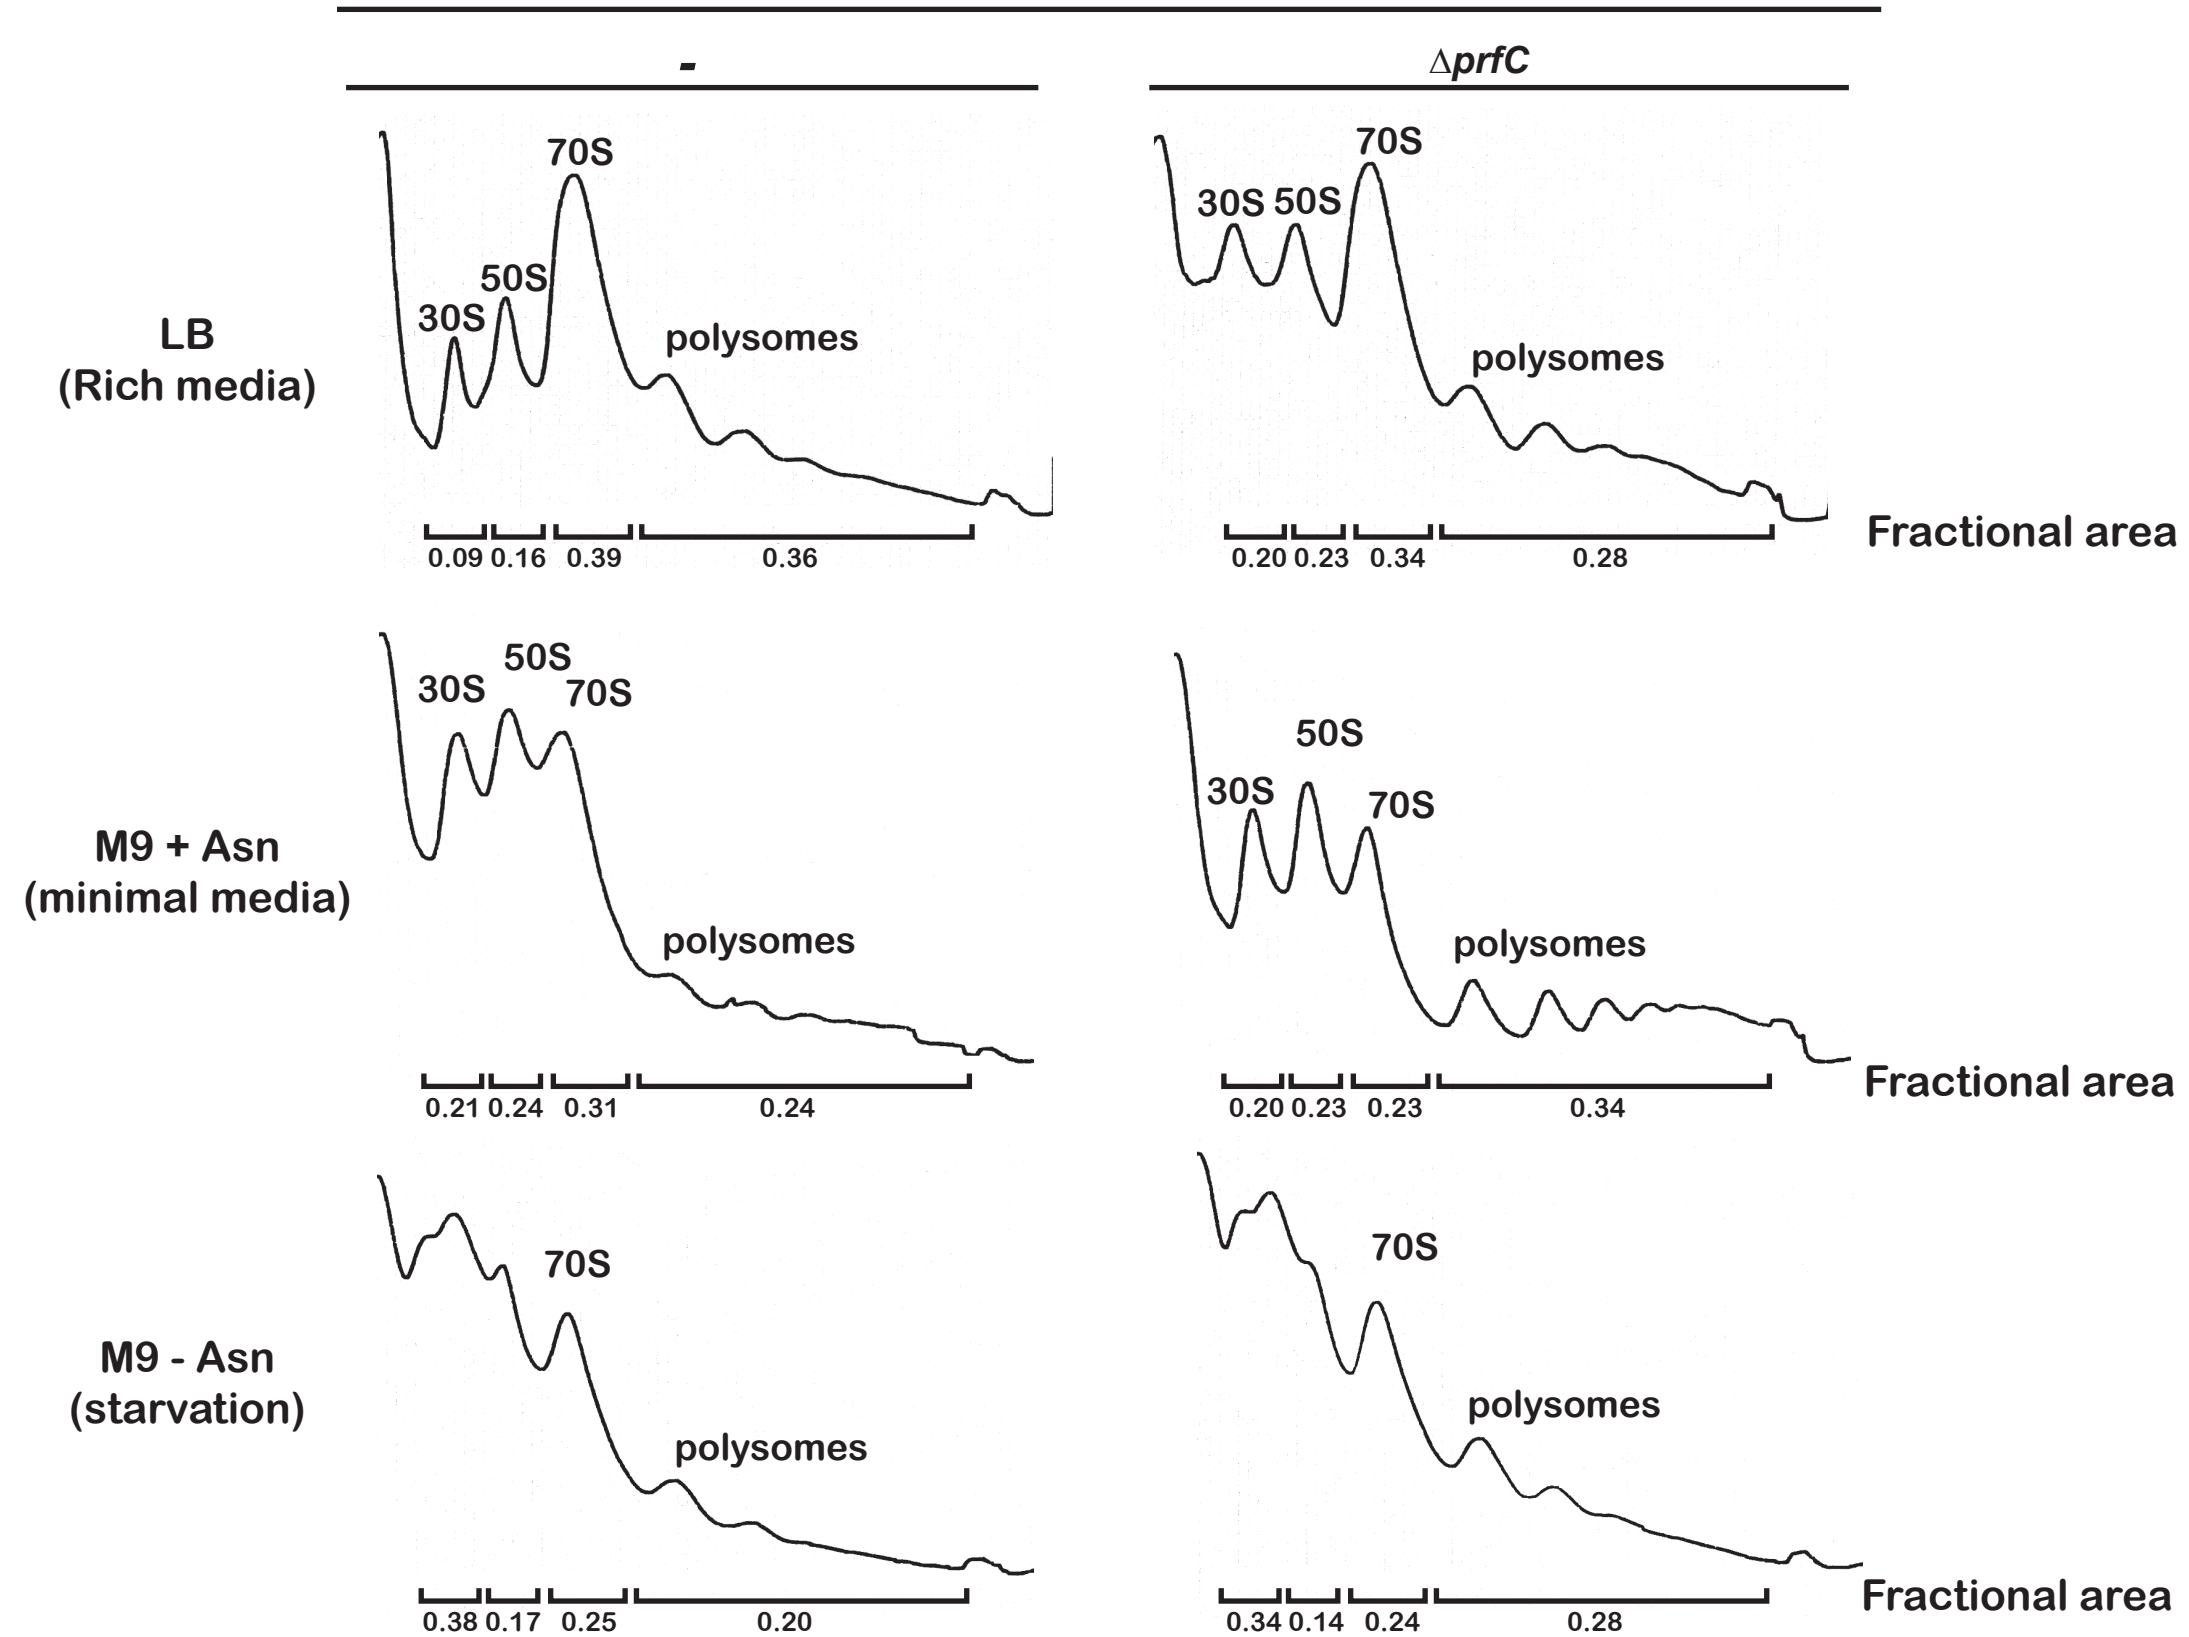

A

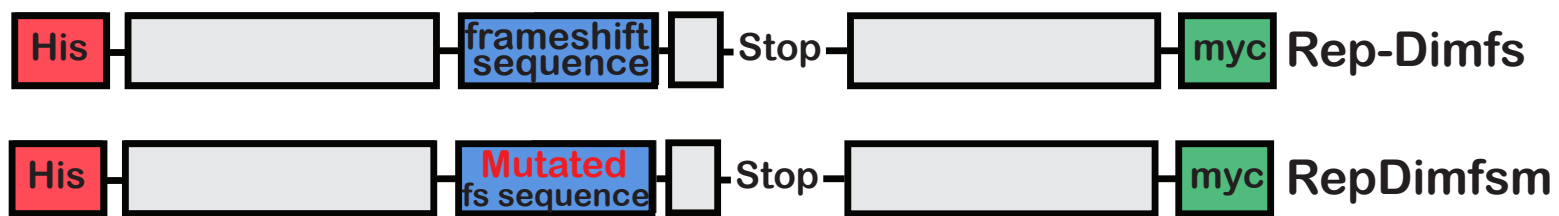

B

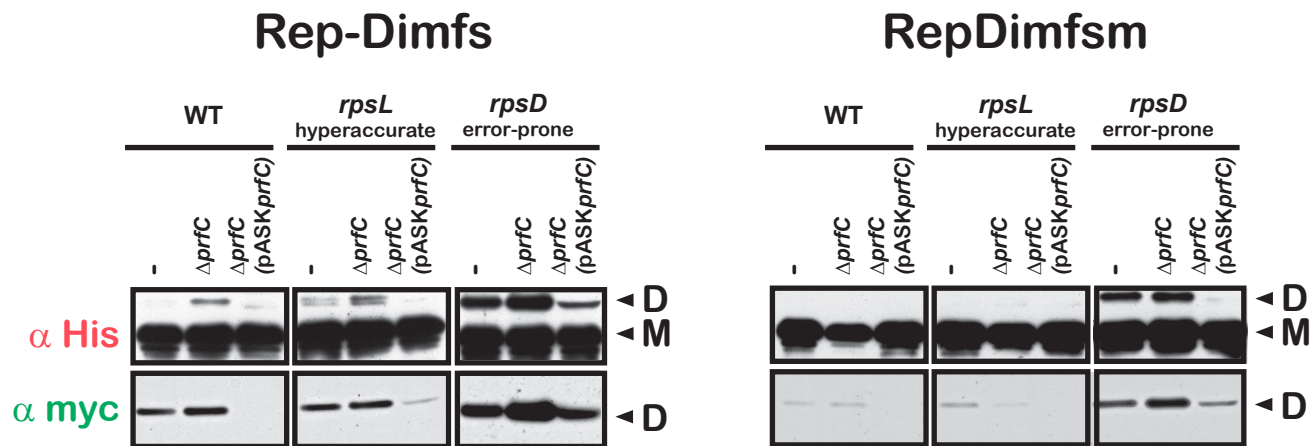

Supplement: NIHMS326465-supplement-02.pdf [file NIHMS326465-supplement-02.pdf]
